# Supplementary material for: Kinetic analysis of the accumulation of a half-sandwich organo-osmium pro-drug in cancer cells
Source: Royal Society of Chemistry journal article supplement (doi:10.1039/c9mt00173e), 2019-09-17
Supplement: c9mt00173e2.xlsx [file c9mt00173e2.xlsx]

## Sheet: FY25_cellular_accumulation
	Osmium cellular accumulation during FY25 exposure
										lts
					ml		ppb			sample	micro grams	nano grams	pico grams
		Plate reading 1	Plate reading 2	Average	Volume	Total cell count	ICP reading	ppb per million cells	Average	volume	per million cells	per million cells	per million cells	dil factor	ng	Average	SD
	2h	69	77	73	6	4380000	0.7641	0.174452	0.174452	0.01	0.00174452	1.74452	1744.52	1	1.74452	1.43568	0.309792
		75	76	75.5	6	4530000	0.5096	0.112494	0.112494	0.01	0.00112494	1.12494	1124.94	1	1.12494
		60	58	59	6	3540000	0.5089	0.143757	0.143757	0.01	0.00143757	1.43757	1437.57	1	1.43757
	4h	71	64	67.5	6	4050000	1.138	0.280988	0.280988	0.01	0.00280988	2.80988	2809.88	1	2.80988	2.98522	0.416857
		72	76	74	6	4440000	1.192	0.268468	0.268468	0.01	0.00268468	2.68468	2684.68	1	2.68468
		55	65	60	6	3600000	1.246	0.346111	0.346111	0.01	0.00346111	3.46111	3461.11	1	3.46111
	8h	73	64	68.5	6	4110000	2.333	0.56764	0.56764	0.01	0.0056764	5.6764	5676.4	1	5.6764	5.66182	0.126589
		74	66	70	6	4200000	2.322	0.552857	0.552857	0.01	0.00552857	5.52857	5528.57	1	5.52857
		79	85	82	6	4920000	2.844	0.578049	0.578049	0.01	0.00578049	5.78049	5780.49	1	5.78049
	24h	138	129	133.5	6	8010000	5.383	0.672035	0.672035	0.01	0.00672035	6.72035	6720.35	1	6.72035	7.38374	0.717446
		129	119	124	6	7440000	6.06	0.814516	0.814516	0.01	0.00814516	8.14516	8145.16	1	8.14516
		78	83	80.5	6	4830000	3.519	0.728571	0.728571	0.01	0.00728571	7.28571	7285.71	1	7.28571
	28h	78	87	82.5	8	6600000	4.573	0.692879	0.692879	0.01	0.00692879	6.92879	6928.79	1	6.92879	6.72678	0.297231
		75	80	77.5	8	6200000	3.959	0.638548	0.638548	0.01	0.00638548	6.38548	6385.48	1	6.38548
		78	90	84	8	6720000	4.614	0.686607	0.686607	0.01	0.00686607	6.86607	6866.07	1	6.86607
	32h	155	149	152	6	9120000	6.035	0.661732	0.661732	0.01	0.00661732	6.61732	6617.32	1	6.61732	6.29426	0.280177
		141	159	150	6	9000000	5.506	0.611778	0.611778	0.01	0.00611778	6.11778	6117.78	1	6.11778
		158	167	162.5	6	9750000	5.994	0.614769	0.614769	0.01	0.00614769	6.14769	6147.69	1	6.14769
	48h	178	188	183	10	18300000	8.408	0.459454	0.459454	0.01	0.00459454	4.59454	4594.54	1	4.59454	4.53454	0.275239
		147	139	143	10	14300000	6.828	0.477483	0.477483	0.01	0.00477483	4.77483	4774.83	1	4.77483
		140	152	146	10	14600000	6.182	0.423425	0.423425	0.01	0.00423425	4.23425	4234.25	1	4.23425
	52h	144	136	140	10	14000000	6.007	0.429071	0.429071	0.01	0.00429071	4.29071	4290.71	1	4.29071	3.99116	0.261942
		150	162	156	10	15600000	5.936	0.380513	0.380513	0.01	0.00380513	3.80513	3805.13	1	3.80513
		164	158	161	10	16100000	6.243	0.387764	0.387764	0.01	0.00387764	3.87764	3877.64	1	3.87764
	56h	139	143	141	12	16920000	5.83	0.344563	0.344563	0.01	0.00344563	3.44563	3445.63	1	3.44563	3.57459	0.268099
		145	138	141.5	12	16980000	6.593	0.38828	0.38828	0.01	0.0038828	3.8828	3882.8	1	3.8828
		154	147	150.5	13	19565000	6.643	0.339535	0.339535	0.01	0.00339535	3.39535	3395.35	1	3.39535
	72h	150	153	151.5	15	22725000	5.55	0.244224	0.244224	0.01	0.00244224	2.44224	2442.24	1	2.44224	2.55719	0.344643
		158	145	151.5	15	22725000	5.192	0.228471	0.228471	0.01	0.00228471	2.28471	2284.71	1	2.28471
		128	132	130	15	19500000	5.742	0.294462	0.294462	0.01	0.00294462	2.94462	2944.62	1	2.94462
	Control	167	184	175.5	6	10530000	0	0	0	0.01	0	0	0	1	0	0	0
		148	122	135	6	8100000	0	0	0	0.01	0	0	0	1	0
		123	144	133.5	6	8010000	0	0	0	0.01	0	0	0	1	0

## Sheet: FY26_cellular_accumulation
	Osmium cellular accumulation during FY26 exposure
										lts
					ml		ppb			sample	micro grams	nano grams	pico grams
		Plate reading 1	Plate reading 2	Average	Volume	Total cell count	ICP reading	ppb per million cells	Average	volume	per million cells	per million cells	per million cells	dil factor	ng	Average	SD
	2h	69	72	70.5	6	4230000	1.815	0.429078	0.429078	0.01	0.00429078	4.29078	4290.78	1	4.29078	3.68423	0.53861
		70	80	75	6	4500000	1.575	0.35	0.35	0.01	0.0035	3.5	3500	1	3.5
		57	69	63	6	3780000	1.233	0.32619	0.32619	0.01	0.0032619	3.2619	3261.9	1	3.2619
	4h	95	82	88.5	6	5310000	2.127	0.400565	0.400565	0.01	0.00400565	4.00565	4005.65	1	4.00565	4.95784	0.949113
		81	75	78	6	4680000	2.763	0.590385	0.590385	0.01	0.00590385	5.90385	5903.85	1	5.90385
		92	84	88	6	5280000	2.621	0.496402	0.496402	0.01	0.00496402	4.96402	4964.02	1	4.96402
	8h	86	72	79	6	4740000	3.727	0.786287	0.786287	0.01	0.00786287	7.86287	7862.87	1	7.86287	8.0145	0.369344
		89	98	93.5	6	5610000	4.345	0.77451	0.77451	0.01	0.0077451	7.7451	7745.1	1	7.7451
		68	69	68.5	6	4110000	3.467	0.843552	0.843552	0.01	0.00843552	8.43552	8435.52	1	8.43552
	24h	112	95	103.5	6	6210000	4.285	0.690016	0.690016	0.01	0.00690016	6.90016	6900.16	1	6.90016	7.74161	0.808786
		110	92	101	6	6060000	5.159	0.85132	0.85132	0.01	0.0085132	8.5132	8513.2	1	8.5132
		126	118	122	6	7320000	5.718	0.781148	0.781148	0.01	0.00781148	7.81148	7811.48	1	7.81148
	28h	72	69	70.5	8	5640000	4.721	0.837057	0.837057	0.01	0.00837057	8.37057	8370.57	1	8.37057	7.53978	0.742885
		86	79	82.5	8	6600000	4.58	0.693939	0.693939	0.01	0.00693939	6.93939	6939.39	1	6.93939
		79	81	80	8	6400000	4.678	0.730938	0.730938	0.01	0.00730937	7.30938	7309.38	1	7.30938
	32h	126	135	130.5	6	7830000	4.832	0.617114	0.617114	0.01	0.00617114	6.17114	6171.14	1	6.17114	6.54291	0.505658
		122	118	120	6	7200000	4.564	0.633889	0.633889	0.01	0.00633889	6.33889	6338.89	1	6.33889
		145	133	139	6	8340000	5.937	0.711871	0.711871	0.01	0.00711871	7.11871	7118.71	1	7.11871
	48h	156	161	158.5	10	15850000	4.975	0.31388	0.31388	0.01	0.0031388	3.1388	3138.8	1	3.1388	3.6424	0.654655
		152	149	150.5	10	15050000	5.126	0.340598	0.340598	0.01	0.00340598	3.40598	3405.98	1	3.40598
		114	125	119.5	10	11950000	5.237	0.438243	0.438243	0.01	0.00438243	4.38243	4382.43	1	4.38243
	52h	128	139	133.5	10	13350000	4.311	0.322921	0.322921	0.01	0.00322921	3.22921	3229.21	1	3.22921	2.922	0.554063
		132	129	130.5	10	13050000	4.247	0.325441	0.325441	0.01	0.00325441	3.25441	3254.41	1	3.25441
		149	152	150.5	10	15050000	3.435	0.228239	0.228239	0.01	0.00228239	2.28239	2282.39	1	2.28239
	56h	148	139	143.5	12	17220000	5.085	0.295296	0.295296	0.01	0.00295296	2.95296	2952.96	1	2.95296	2.82039	0.131131
		138	125	131.5	12	15780000	4.246	0.269075	0.269075	0.01	0.00269075	2.69075	2690.75	1	2.69075
		120	116	118	13	15340000	4.322	0.281747	0.281747	0.01	0.00281747	2.81747	2817.47	1	2.81747
	72h	165	159	162	15	24300000	1.261	0.051893	0.051893	0.01	0.00051893	0.51893	518.93	1	0.51893	0.840768	0.361855
		147	151	149	15	22350000	1.723	0.0770917	0.0770917	0.01	0.000770917	0.770917	770.917	1	0.770917
		155	149	152	15	22800000	2.81	0.123246	0.123246	0.01	0.00123246	1.23246	1232.46	1	1.23246

## Sheet: FY25_efflux
	Osmium efflux after FY25 exposure
										lts
					ml		ppb			sample	micro grams	nano grams	pico grams
		Plate reading 1	Plate reading 2	Average	Volume	Total cell count	ICP reading	ppb per million cells	Average	volume	per million cells	per million cells	per million cells	dil factor	ng	Average	SD
	0h	128	112	120	11	13200000	41.98	3.1803	3.1803	0.003	0.00954091	9.54091	9540.91	1	9.54091	8.70612	0.750916
		118	109	113.5	11	12485000	33.65	2.69523	2.69523	0.003	0.0080857	8.0857	8085.7	1	8.0857
		112	108	110	11	12100000	34.25	2.83058	2.83058	0.003	0.00849174	8.49174	8491.74	1	8.49174
	2h	80	69	74.5	11	8195000	20.76	2.53325	2.53325	0.003	0.00759976	7.59976	7599.76	1	7.59976	7.98892	0.337352
		136	114	125	11	13750000	37.44	2.72291	2.72291	0.003	0.00816873	8.16873	8168.73	1	8.16873
		141	124	132.5	11	14575000	39.83	2.73276	2.73276	0.003	0.00819828	8.19828	8198.28	1	8.19828
	4h	88	93	90.5	11	9955000	21.04	2.11351	2.11351	0.003	0.00634053	6.34053	6340.53	1	6.34053	6.63222	0.254655
		125	116	120.5	11	13255000	30.09	2.27009	2.27009	0.003	0.00681026	6.81026	6810.26	1	6.81026
		112	103	107.5	11	11825000	26.59	2.24863	2.24863	0.003	0.00674588	6.74588	6745.88	1	6.74588
	6h	139	143	141	11	15510000	33.11	2.13475	2.13475	0.003	0.00640426	6.40426	6404.26	1	6.40426	6.25679	0.175092
		132	118	125	11	13750000	27.79	2.02109	2.02109	0.003	0.00606327	6.06327	6063.27	1	6.06327
		145	154	149.5	11	16445000	34.55	2.10094	2.10094	0.003	0.00630283	6.30283	6302.83	1	6.30283
	8h	170	165	167.5	11	18425000	33.11	1.79701	1.79701	0.003	0.00539104	5.39104	5391.04	1	5.39104	5.53779	0.621591
		146	157	151.5	11	16665000	27.79	1.66757	1.66757	0.003	0.0050027	5.0027	5002.7	1	5.0027
		161	142	151.5	11	16665000	34.55	2.07321	2.07321	0.003	0.00621962	6.21962	6219.62	1	6.21962
	24h	197	175	186	11	20460000	32.78	1.60215	1.60215	0.003	0.00480645	4.80645	4806.45	1	4.80645	4.74755	0.115347
		199	206	202.5	11	22275000	35.8	1.60718	1.60718	0.003	0.00482155	4.82155	4821.55	1	4.82155
		168	171	169.5	11	18645000	28.68	1.53821	1.53821	0.003	0.00461464	4.61464	4614.64	1	4.61464
	28h	141	146	143.5	11	15785000	20.52	1.29997	1.29997	0.003	0.0038999	3.8999	3899.9	1	3.8999	3.47821	0.366126
		124	154	139	11	15290000	16.52	1.08044	1.08044	0.003	0.00324133	3.24133	3241.33	1	3.24133
		138	126	132	11	14520000	15.94	1.0978	1.0978	0.003	0.00329339	3.29339	3293.39	1	3.29339
	32h	236	223	229.5	11	25245000	27.01	1.06991	1.06991	0.003	0.00320974	3.20974	3209.74	1	3.20974	3.21537	0.0534264
		208	200	204	11	22440000	24.47	1.09046	1.09046	0.003	0.00327139	3.27139	3271.39	1	3.27139
		210	195	202.5	11	22275000	23.5	1.05499	1.05499	0.003	0.00316498	3.16498	3164.98	1	3.16498

## Sheet: FY26_efflux
	Osmium efflux after FY26 exposure
										lts
					ml		ppb			sample	micro grams	nano grams	pico grams
		Plate reading 1	Plate reading 2	Average	Volume	Total cell count	ICP reading	ppb per million cells	Average	volume	per million cells	per million cells	per million cells	dil factor	ng	Average	SD
	0h	60	62	61	11	6710000	19.66	2.92996	2.92996	0.003	0.00878987	8.78987	8789.87	1	8.78987	8.6936	0.730389
		59	63	61	11	6710000	20.96	3.1237	3.1237	0.003	0.00937109	9.37109	9371.09	1	9.37109
		78	74	76	11	8360000	22.07	2.63995	2.63995	0.003	0.00791986	7.91986	7919.86	1	7.91986
	2h	63	58	60.5	11	6655000	20.15	3.0278	3.0278	0.003	0.0090834	9.0834	9083.4	1	9.0834	8.5503	0.769619
		69	64	66.5	11	7315000	21.7	2.96651	2.96651	0.003	0.00889952	8.89952	8899.52	1	8.89952
		71	67	69	11	7590000	19.4	2.55599	2.55599	0.003	0.00766798	7.66798	7667.98	1	7.66798
	4h	75	69	72	11	7920000	22.59	2.85227	2.85227	0.003	0.00855682	8.55682	8556.82	1	8.55682	8.30809	0.275303
		63	66	64.5	11	7095000	19.76	2.78506	2.78506	0.003	0.00835518	8.35518	8355.18	1	8.35518
		79	69	74	11	8140000	21.74	2.67076	2.67076	0.003	0.00801229	8.01229	8012.29	1	8.01229
	6h	87	72	79.5	11	8745000	20.92	2.39222	2.39222	0.003	0.00717667	7.17667	7176.67	1	7.17667	6.11037	0.924149
		48	59	53.5	11	5885000	10.87	1.84707	1.84707	0.003	0.00554121	5.54121	5541.21	1	5.54121
		59	51	55	11	6050000	11.32	1.87107	1.87107	0.003	0.00561322	5.61322	5613.22	1	5.61322
	8h	106	94	100	11	11000000	20.74	1.88545	1.88545	0.003	0.00565636	5.65636	5656.36	1	5.65636	5.74553	0.649183
		100	103	101.5	11	11165000	19.15	1.71518	1.71518	0.003	0.00514554	5.14554	5145.54	1	5.14554
		136	125	130.5	11	14355000	30.79	2.1449	2.1449	0.003	0.00643469	6.43469	6434.69	1	6.43469
	24h	115	110	112.5	11	12375000	15.27	1.23394	1.23394	0.003	0.00370182	3.70182	3701.82	1	3.70182	3.44618	0.221596
		132	125	128.5	11	14135000	15.59	1.10294	1.10294	0.003	0.00330881	3.30881	3308.81	1	3.30881
		122	135	128.5	11	14135000	15.68	1.1093	1.1093	0.003	0.00332791	3.32791	3327.91	1	3.32791
	28h	127	115	121	11	13310000	12.85	0.96544	0.96544	0.003	0.00289632	2.89632	2896.32	1	2.89632	3.08506	0.311327
		96	101	98.5	11	10835000	12.44	1.14813	1.14813	0.003	0.00344439	3.44439	3444.39	1	3.44439
		140	131	135.5	11	14905000	14.48	0.971486	0.971486	0.003	0.00291446	2.91446	2914.46	1	2.91446
	32h	136	149	142.5	11	15675000	14.27	0.910367	0.910367	0.003	0.0027311	2.7311	2731.1	1	2.7311	2.73365	0.140625
		144	154	149	11	16390000	15.71	0.958511	0.958511	0.003	0.00287553	2.87553	2875.53	1	2.87553
		157	163	160	11	17600000	15.22	0.864773	0.864773	0.003	0.00259432	2.59432	2594.32	1	2.59432
	Control	210	218	214	11	23540000	0	0	0	0.003	0	0	0	1	0	0	0
		225	231	228	11	25080000	0	0	0	0.003	0	0	0	1	0
		208	213	210.5	11	23155000	0	0	0	0.003	0	0	0	1	0

## Sheet: FY25_temperature_dependency
	Temperature-dependency of osmium cellular accumulation during FY25 exposure
										lts
					ml		ppb			sample	micro grams	nano grams	pico grams
		Plate reading 1	Plate reading 2	Average	Volume	Total cell count	average	ppb per million cells	Average	volume	per million cells	per million cells	per million cells	dil factor	ng	moyenne	SD
	FY25 4C-2h	68	82	75	7	5250000	0	0	0	0.003	0	0	0	1	0	0.0237729	0.0411759
		65	71	68	7	4760000	0	0	0	0.003	0	0	0	1	0
		71	85	78	7	5460000	0.1298	0.0237729	0.0237729	0.003	7.13187e-05	0.0713187	71.3187	1	0.0713187
	FY25 4C-4h	65	71	68	7	4760000	0	0	0	0.003	0	0	0	1	0	0	0
		51	48	49.5	7	3465000	0	0	0	0.003	0	0	0	1	0
		41	52	46.5	7	3255000	0	0	0	0.003	0	0	0	1	0
	FY25 4C-8h	146	154	150	7	10500000	0.9647	0.0918762	0.0918762	0.003	0.000275629	0.275629	275.629	1	0.275629	0.278415	0.0157033
		129	136	132.5	7	9275000	0.8171	0.088097	0.088097	0.003	0.000264291	0.264291	264.291	1	0.264291
		112	108	110	7	7700000	0.758	0.0984416	0.0984416	0.003	0.000295325	0.295325	295.325	1	0.295325
	FY25 23C-2h	71	85	78	7	5460000	0.8052	0.147473	0.147473	0.003	0.000442418	0.442418	442.418	1	0.442418	0.496087	0.114234
		64	86	75	7	5250000	0.7325	0.139524	0.139524	0.003	0.000418571	0.418571	418.571	1	0.418571
		81	95	88	7	6160000	1.288	0.209091	0.209091	0.003	0.000627273	0.627273	627.273	1	0.627273
	FY25 23C-4h	18	14	16	7	1120000	0.4616	0.412143	0.412143	0.003	0.00123643	1.23643	1236.43	1	1.23643	1.17429	0.0907881
		101	93	97	7	6790000	2.753	0.405449	0.405449	0.003	0.00121635	1.21635	1216.35	1	1.21635
		54	43	48.5	7	3395000	1.211	0.356701	0.356701	0.003	0.0010701	1.0701	1070.1	1	1.0701
	FY25 23C-8h	128	136	132	7	9240000	4.211	0.455736	0.455736	0.003	0.00136721	1.36721	1367.21	1	1.36721	1.56764	0.257784
		191	183	187	7	13090000	8.109	0.619481	0.619481	0.003	0.00185844	1.85844	1858.44	1	1.85844
		138	126	132	7	9240000	4.55	0.492424	0.492424	0.003	0.00147727	1.47727	1477.27	1	1.47727
	FY25 37C-2h	97	82	89.5	7	6265000	4.101	0.654589	0.654589	0.003	0.00196377	1.96377	1963.77	1	1.96377	1.76747	0.261983
		118	109	113.5	7	7945000	3.893	0.489994	0.489994	0.003	0.00146998	1.46998	1469.98	1	1.46998
		100	116	108	7	7560000	4.709	0.622884	0.622884	0.003	0.00186865	1.86865	1868.65	1	1.86865
	FY25 37C-4h	75	64	69.5	7	4865000	2.584	0.531141	0.531141	0.003	0.00159342	1.59342	1593.42	1	1.59342	2.45878	0.74959
		118	121	119.5	7	8365000	8.018	0.958518	0.958518	0.003	0.00287555	2.87555	2875.55	1	2.87555
		76	85	80.5	7	5635000	5.461	0.969122	0.969122	0.003	0.00290736	2.90736	2907.36	1	2.90736
	FY25 37C-8h	160	172	166	7	11620000	18.6	1.60069	1.60069	0.003	0.00480207	4.80207	4802.07	1	4.80207	5.64927	0.741345
		138	145	141.5	7	9905000	19.7	1.98889	1.98889	0.003	0.00596668	5.96668	5966.68	1	5.96668
		140	152	146	7	10220000	21.05	2.05969	2.05969	0.003	0.00617906	6.17906	6179.06	1	6.17906
	CONTROL	192	185	188.5	10	18850000	0.476	0.025252	0.025252	0.003	7.5756e-05	0.075756	75.756	1	0.075756	0.0761781	0.00537763
		173	169	171	10	17100000	0.466	0.0272515	0.0272515	0.003	8.17544e-05	0.0817544	81.7544	1	0.0817544
		180	195	187.5	10	18750000	0.4439	0.0236747	0.0236747	0.003	7.1024e-05	0.071024	71.024	1	0.071024

## Sheet: FY26_temperature_dependency
	Temperature-dependency of osmium cellular accumulation during FY26 exposure
										lts
					ml		ppb			sample	micro grams	nano grams	pico grams
		Plate reading 1	Plate reading 2	Average	Volume	Total cell count	average	ppb per million cells	Average	volume	per million cells	per million cells	per million cells	dil factor	ng	moyenne	SD
	FY26 4C-2h	97	90	93.5	7	6545000	0	0	0	0.003	0	0	0	1	0	0	0
		75	80	77.5	7	5425000	0	0	0	0.003	0	0	0	1	0
		88	72	80	7	5600000	0	0	0	0.003	0	0	0	1	0
	FY26 4C-4h	61	49	55	7	3850000	0	0	0	0.003	0	0	0	1	0	0	0
		52	56	54	7	3780000	0	0	0	0.003	0	0	0	1	0
		65	85	75	7	5250000	0	0	0	0.003	0	0	0	1	0
	FY26 4C-8h	113	121	117	7	8190000	0.7215	0.0880952	0.0880952	0.003	0.000264286	0.264286	264.286	1	0.264286	0.265519	0.00515423
		125	118	121.5	7	8505000	0.7402	0.0870312	0.0870312	0.003	0.000261093	0.261093	261.093	1	0.261093
		130	121	125.5	7	8785000	0.7941	0.0903927	0.0903927	0.003	0.000271178	0.271178	271.178	1	0.271178
	FY26 23C-2h	36	48	42	7	2940000	0.5555	0.188946	0.188946	0.003	0.000566837	0.566837	566.837	1	0.566837	0.587307	0.0391093
		65	65	65	7	4550000	0.8534	0.18756	0.18756	0.003	0.000562681	0.562681	562.681	1	0.562681
		60	72	66	7	4620000	0.9739	0.210801	0.210801	0.003	0.000632403	0.632403	632.403	1	0.632403
	FY26 23C-4h	45	53	49	7	3430000	1.358	0.395918	0.395918	0.003	0.00118776	1.18776	1187.76	1	1.18776	1.37926	0.166441
		105	94	99.5	7	6965000	3.457	0.496339	0.496339	0.003	0.00148902	1.48902	1489.02	1	1.48902
		112	109	110.5	7	7735000	3.767	0.487007	0.487007	0.003	0.00146102	1.46102	1461.02	1	1.46102
	FY26 23C-8h	75	81	78	7	5460000	3.938	0.721245	0.721245	0.003	0.00216374	2.16374	2163.74	1	2.16374	2.17595	0.119828
		73	66	69.5	7	4865000	3.345	0.687564	0.687564	0.003	0.00206269	2.06269	2062.69	1	2.06269
		142	151	146.5	7	10255000	7.867	0.767138	0.767138	0.003	0.00230141	2.30141	2301.41	1	2.30141
	FY26 37C-2h	49	41	45	5	2250000	2.428	1.07911	1.07911	0.003	0.00323733	3.23733	3237.33	1	3.23733	3.23447	0.17659
		55	49	52	5	2600000	2.955	1.13654	1.13654	0.003	0.00340962	3.40962	3409.62	1	3.40962
		28	23	25.5	5	1275000	1.299	1.01882	1.01882	0.003	0.00305647	3.05647	3056.47	1	3.05647
	FY26 37C-4h	28	31	29.5	5	1475000	1.434	0.972203	0.972203	0.003	0.00291661	2.91661	2916.61	1	2.91661	4.50946	1.40278
		36	29	32.5	5	1625000	2.736	1.68369	1.68369	0.003	0.00505108	5.05108	5051.08	1	5.05108
		33	26	29.5	5	1475000	2.734	1.85356	1.85356	0.003	0.00556068	5.56068	5560.68	1	5.56068
	FY26 37C-8h	75	81	78	5	3900000	11.01	2.82308	2.82308	0.003	0.00846923	8.46923	8469.23	1	8.46923	8.66887	0.28982
		51	42	46.5	5	2325000	6.976	3.00043	3.00043	0.003	0.00900129	9.00129	9001.29	1	9.00129
		44	53	48.5	5	2425000	6.9	2.84536	2.84536	0.003	0.00853608	8.53608	8536.08	1	8.53608
	CONTROL	192	185	188.5	10	18850000	0.476	0.025252	0.025252	0.003	7.5756e-05	0.075756	75.756	1	0.075756	0.0761781	0.00537763
		173	169	171	10	17100000	0.466	0.0272515	0.0272515	0.003	8.17544e-05	0.0817544	81.7544	1	0.0817544
		180	195	187.5	10	18750000	0.4439	0.0236747	0.0236747	0.003	7.1024e-05	0.071024	71.024	1	0.071024
